# Supplementary material
Source: MDPI journal article supplement (https://www.mdpi.com/2673-4125/3/2/18)
Supplement: s1 [file s1]

Archive with 1 entries (1 files):
- biophysica-2283487-supplementary.pdf
